# Supplementary material
Source: PubMed Central journal article supplement (PMC3306259)
Supplement: neo1402_0141SD1.pdf [file neo1402_0141SD1.pdf]

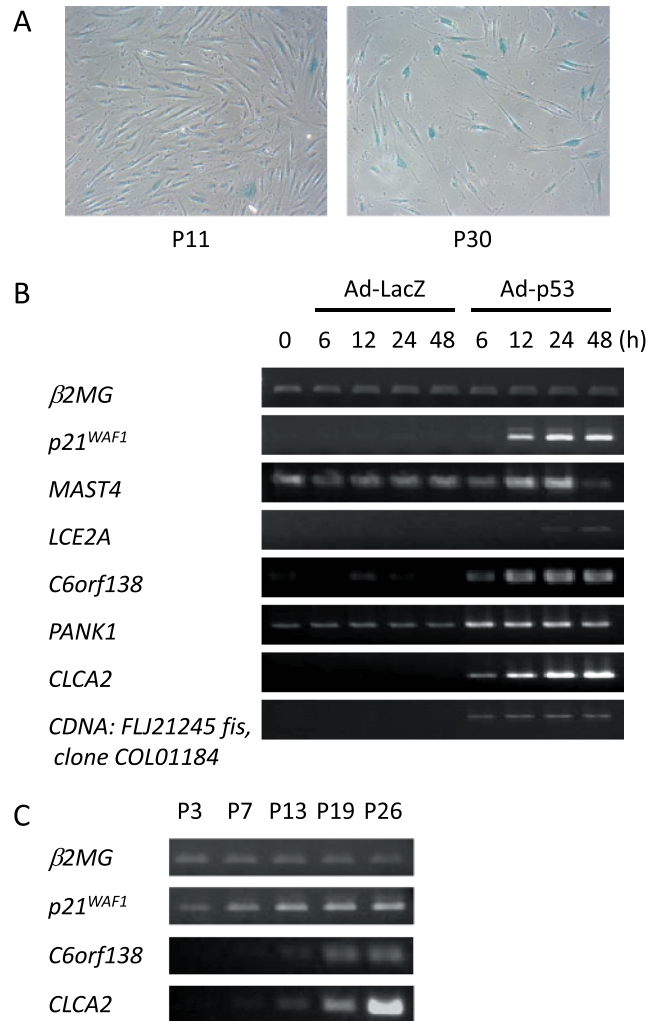

**Figure W1.** Replicative senescence in late-passage fibroblast. (A) After 30 times of passage, the cells were subjected to SA- $\beta$ -gal staining. (B) RT-PCR analysis of six candidate mRNAs in U373MG cells at indicated times after infection with Ad-p53 or Ad-LacZ.  *$\beta$ 2-Microglobulin* was used for the normalization of expression levels. *p21<sup>WAF1</sup>* served as a positive control. (C) RT-PCR analysis of *C6orf138* and *CLCA2* mRNAs in NHDF cells at indicated passage levels.  *$\beta$ 2-Microglobulin* was used for the normalization of expression levels. *p21<sup>WAF1</sup>* served as a positive control.

**Table W1.** List of 85 Senescence-Associated Genes.

| Gene                       | P26/P3 | p53 Induction |
|----------------------------|--------|---------------|
| <i>MAST4</i>               | >50    | ++            |
| <i>RGS4</i>                | >50    |               |
| <i>PPP4R4</i>              | >50    |               |
| <i>ZNF367</i>              | >50    |               |
| <i>SORT1</i>               | >50    |               |
| <i>SYPL2</i>               | >50    |               |
| <i>LCE2A</i>               | >50    | ++            |
| <i>MOSC1</i>               | >50    |               |
| <i>TOMM40L</i>             | >50    |               |
| <i>CDNA FLJ32320 fis</i>   | >50    |               |
| <i>SDPR</i>                | >50    |               |
| <i>PPFIA2</i>              | >50    |               |
| <i>KIAA1147</i>            | >50    |               |
| <i>C6orf138</i>            | >50    | ++            |
| <i>DSCC1</i>               | >50    |               |
| <i>POLR3G</i>              | >50    |               |
| <i>ETV4</i>                | >50    |               |
| <i>PARG</i>                | >50    |               |
| <i>SIGLEC15</i>            | >50    |               |
| <i>Clone IMAGE:35527</i>   | >50    |               |
| <i>LEPR</i>                | >50    |               |
| <i>RBM24</i>               | >50    |               |
| <i>BRI3BP</i>              | >50    |               |
| <i>ANXA1</i>               | >50    |               |
| <i>HSFE-1</i>              | >50    |               |
| <i>Clone 23555</i>         | >50    |               |
| <i>CCIN</i>                | >50    |               |
| <i>CACNA1H</i>             | >50    |               |
| <i>SLC7A14</i>             | >50    |               |
| <i>KLRF1</i>               | >50    | +             |
| <i>PANK1</i>               | >50    | ++            |
| <i>ENPP5</i>               | >50    |               |
| <i>CPEB2</i>               | >50    |               |
| <i>C11orf41</i>            | >50    |               |
| <i>cDNA DKFZp686O 1044</i> | >50    |               |
| <i>TFDP1</i>               | >50    |               |
| <i>RASD1</i>               | >50    |               |
| <i>NAP1L2</i>              | >50    |               |
| <i>DHRS12</i>              | >50    |               |
| <i>EIF2C1</i>              | >50    |               |
| <i>SLC7A14</i>             | >50    |               |
| <i>CLCA2</i>               | >50    | ++            |
| <i>CYP3A5</i>              | >50    |               |

**Table W1.** (continued).

| Gene                      | P26/P3 | p53 Induction |
|---------------------------|--------|---------------|
| <i>RNLS</i>               | >50    |               |
| <i>MAST4</i>              | 41.74  |               |
| <i>SFRP4</i>              | 41.67  |               |
| <i>RGS2</i>               | 40.24  |               |
| <i>DTL</i>                | 39.38  |               |
| <i>NPTX1</i>              | 30.78  |               |
| <i>INA</i>                | 29.34  |               |
| <i>NAT8L</i>              | 28.66  | +             |
| <i>MMP1</i>               | 28.28  |               |
| <i>DBNDD1</i>             | 24.25  |               |
| <i>CCND1</i>              | 22.55  |               |
| <i>ATP8B4</i>             | 22.11  |               |
| <i>GLTPD1</i>             | 22.02  |               |
| <i>MET</i>                | 21.58  |               |
| <i>CCND1</i>              | 20.73  |               |
| <i>MFAP1</i>              | 20.20  |               |
| <i>CCND2</i>              | 18.71  |               |
| <i>C9orf57</i>            | 18.21  |               |
| <i>FNDC5</i>              | 16.78  |               |
| <i>PHLDA1</i>             | 15.91  |               |
| <i>CIT</i>                | 15.55  |               |
| <i>SLC1A2</i>             | 15.32  |               |
| <i>KLHDC9</i>             | 14.87  |               |
| <i>TOR1AIP1</i>           | 14.55  |               |
| <i>IFIT2</i>              | 14.42  |               |
| <i>ENY2</i>               | 14.26  |               |
| <i>RNF219</i>             | 13.97  |               |
| <i>CDNA: FLJ21245 fis</i> | 13.40  | ++            |
| <i>PRKG2</i>              | 12.32  |               |
| <i>TNIK</i>               | 12.06  |               |
| <i>APBA1</i>              | 11.76  |               |
| <i>TMEM158</i>            | 11.58  | +             |
| <i>E2F7</i>               | 11.33  | +             |
| <i>CNTN3</i>              | 10.96  |               |
| <i>CYYR1</i>              | 10.93  |               |
| <i>SLC35A3</i>            | 10.77  |               |
| <i>GPR68</i>              | 10.76  |               |
| <i>SYNM</i>               | 10.63  |               |
| <i>ITGA6</i>              | 10.56  |               |
| <i>VWF</i>                | 10.54  |               |
| <i>PLCB1</i>              | 10.38  |               |
| <i>CENPQ</i>              | 10.19  |               |

“+” indicates more than 5-fold induction at 24 or 48 hours after infection with Ad-p53; “++,” more than 10-fold induction at 24 or 48 hours after infection with Ad-p53.

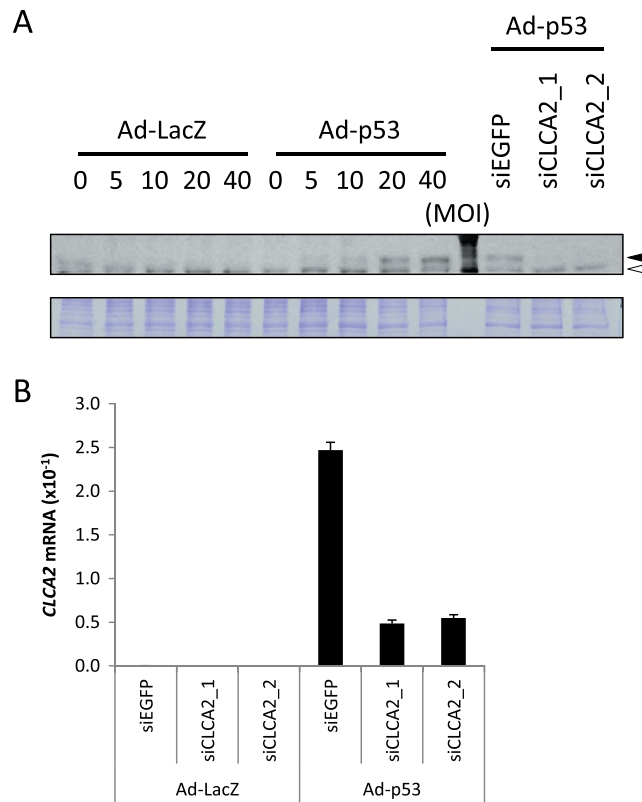

**Figure W2.** Ectopic expression of p53 induced CLCA2 protein. (A) Western blot analysis of CLCA2 protein in U373MG cells at 48 hours after infection with Ad-p53 or Ad-LacZ at indicated doze. CBB staining was used for the normalization protein loading. siCLCA2\_1, siCLCA2\_2, or siEGFP was transfected at 7 hours before adenovirus infection at 20 MOI. Black arrowhead indicates CLCA2 protein; open arrowhead, nonspecific band. (B) Quantitative RT-PCR analysis of CLCA2 in U373MG cells 48 hours after infection with Ad-LacZ or Ad-p53 at 20 MOI. siCLCA2\_1, siCLCA2\_2, or siEGFP was transfected 7 hours before adenovirus infection.

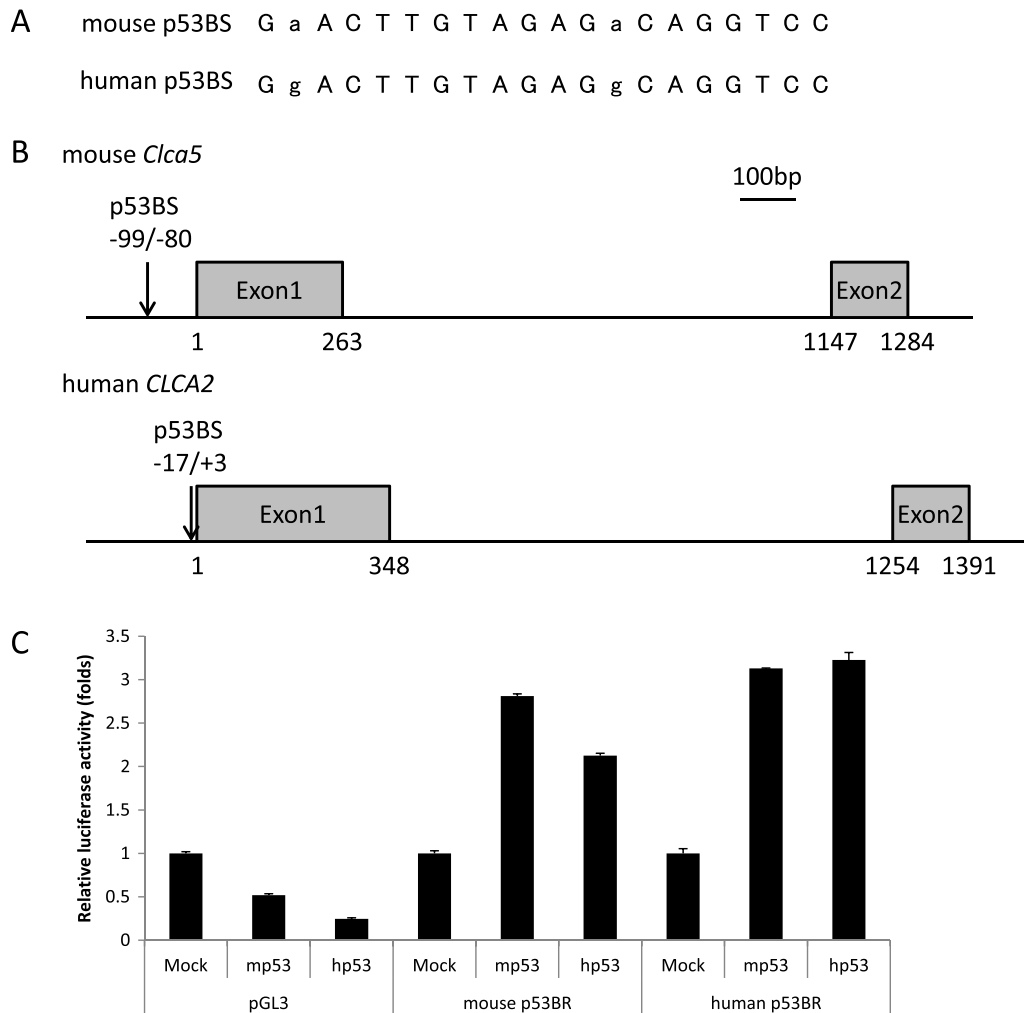

**Figure W3.** Comparison of mouse *Clca5* and human *CLCA2*. (A) Alignment of mouse p53BS and human p53BS. Nucleotides conserved between human and mouse are written in capital letters. (B) Genomic structures of the mouse *Clca5* and human *CLCA2* genes. Gray boxes indicate the locations and relative sizes of the two exons. Arrows indicate the locations of potential p53-binding sites. (C) Results of luciferase assay of p53BR are shown. Luciferase activity is indicated relative to the activity of mock vector with SDs ( $n = 2$ ).

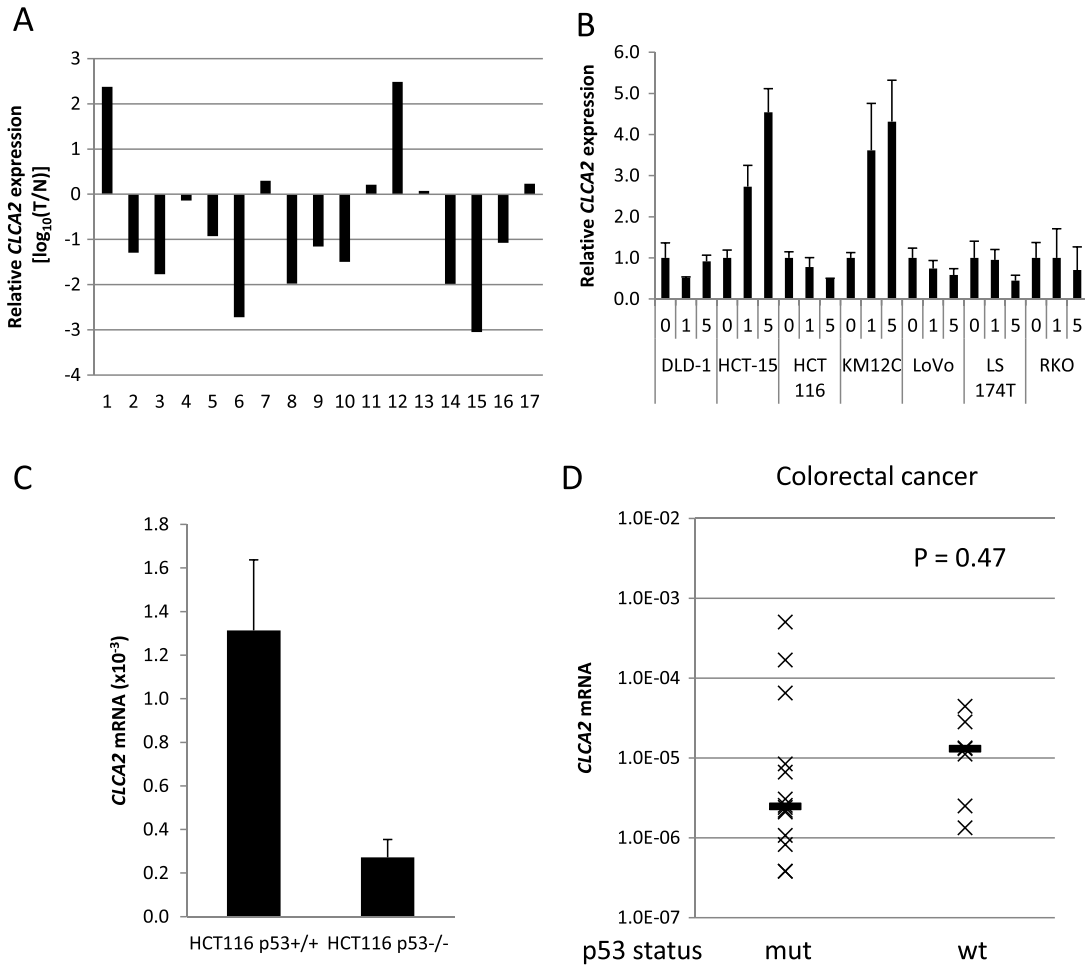

**Figure W4.** Suppression of *CLCA2* expression in colorectal cancer tissues. (A) Relative *CLCA2* expressions in colorectal cancer tissues compared with normal tissues were examined by quantitative real-time PCR analysis. *β-Actin* was used for the normalization of expression levels. (B) Seven colorectal cancer cell lines were treated with 1 or 5  $\mu$ M of 5-Aza. *CLCA2* expressions were examined by quantitative real-time PCR analysis. *β2-Microglobulin* was used for the normalization of expression levels. (C) *CLCA2* expressions were examined by quantitative real-time PCR analysis. *β2-Microglobulin* was used for the normalization of expression levels. (D) *CLCA2* expressions were examined by quantitative real-time PCR analysis in 21 colorectal cancer cell lines. *β2-Microglobulin* was used for the normalization of expression levels. Student's *t* test was applied for comparing the *CLCA2* expressions in p53 mutant cell lines with those in p53 wild-type cell lines.

**Table W2.** List of Cancer Cell Lines.

| No. | Colorectal Cancer Cell Lines |
|-----|------------------------------|
| 1   | DLD-1                        |
| 2   | HCT-15                       |
| 3   | HT-29                        |
| 4   | KM12C                        |
| 5   | KM12SM                       |
| 6   | NCI-H508                     |
| 7   | NCI-H684                     |
| 8   | NCI-H716                     |
| 9   | SNU-C2A                      |
| 10  | SNU C5                       |
| 11  | SW480                        |
| 12  | SW620                        |
| 13  | SW948                        |
| 14  | WiDr                         |
| 15  | HCT 116                      |
| 16  | LoVo                         |
| 17  | LS 174T                      |
| 18  | NCI-H498                     |
| 19  | RKO                          |
| 20  | SNU C4                       |
| 21  | SW48                         |

**Table W3.** Sequences of Primers and RNA Nucleotides.

|                                                  | Sense                       | Antisense                   |
|--------------------------------------------------|-----------------------------|-----------------------------|
| siRNA oligonucleotides                           |                             |                             |
| siCLCA2_1                                        | GGAAUUUACUCGAGGUAUUTT       | AAUACCUCGAGUAAAUCCTT        |
| siCLCA2_2                                        | GAUGAAUGCUCGAAGAAATT        | UUUCCUUGGAGCAUUCAUCTT       |
| si p53                                           | GACUCCAGUGGUAUUCUACTT       | GUAGAUUACCACUGGAGUCTT       |
| siEGFP                                           | GCAGCAGACUUCUUAAGTT         | CUUGAAGAAGUCGUGCUGCTT       |
|                                                  | Forward                     | Reverse                     |
| Quantitative real-time PCR (SYBR Green I Master) |                             |                             |
| CLCA2                                            | ATACCTGCCACATGGAAGC         | CCTCTTTTCCACACCCTCTG        |
| p21 <sup>WAF1</sup>                              | AAGATCAGCCGGCGTTTG          | GACCTGTCACTGTCTTGTACCC      |
| β2-Microglobulin                                 | TCTCTCTTTCTGGCCTGGAG        | AATGTCGGATGGATGAAACC        |
| Clca5 (mouse)                                    | CCGAGTGGTCTGCTTAGTGA        | TACAGTTCGGCTGCTTGTTG        |
| β-Actin (mouse)                                  | CTAAGGCCAACCGTGAAAAG        | ACCAGAGGCATACAGGGACA        |
| p16                                              | AGCATGGAGCCTTCGGCTGA        | CCATCATCATGACCTGGATCG       |
| Quantitative real-time PCR (Probe Master)        |                             |                             |
| CLCA2 no. 21                                     | AGAAGAGGTCAGCAGGGAGA        | CTCTTGATGGAGAAAAGGATTAAGA   |
| β-Actin no. 55                                   | TAGGAGGGCTGGCAACTTAG        | CCAAGATGTTGATGTTGGATAAGA    |
| Site-directed mutagenesis                        |                             |                             |
| mClca5_mtp53BS1                                  | AGATAGTTCAGATAGATCCACCCCA   | CTAAAAATTCCTCTCCAAGGCAACGC  |
| mClca5_mtp53BS2                                  | GAATGTTCTCAAGAGGTGTGACTTAA  | AGGACTATGCCTTTTAAAAACATTATT |
| mClca5_mtp53BS3                                  | TAATATTTAATCAGTGTGCTAAAATCT | GGGATTACGCTCATGATCTCCCCAAGT |
| Semiquantitative RT-PCR                          |                             |                             |
| CLCA2                                            | CAGATGTGCAGCCTCAGAAG        | TGCTGAGCACAGTGGGTAAG        |
| p21 <sup>WAF1</sup>                              | GTTCCTTGTGGAGCCGGAGC        | GGTACAAGACAGTACAGGTC        |
| β2-Microglobulin                                 | CACCCCACTGAAAAAGATGA        | TACCTGTGGAGCAACCTGC         |
